# Supplementary material
Source: PubMed Central journal article supplement (PMC2597057)

Type of file: figure

Label: s1

Filename: Supp.Fig.1.GIF

## Supplement Figure 1

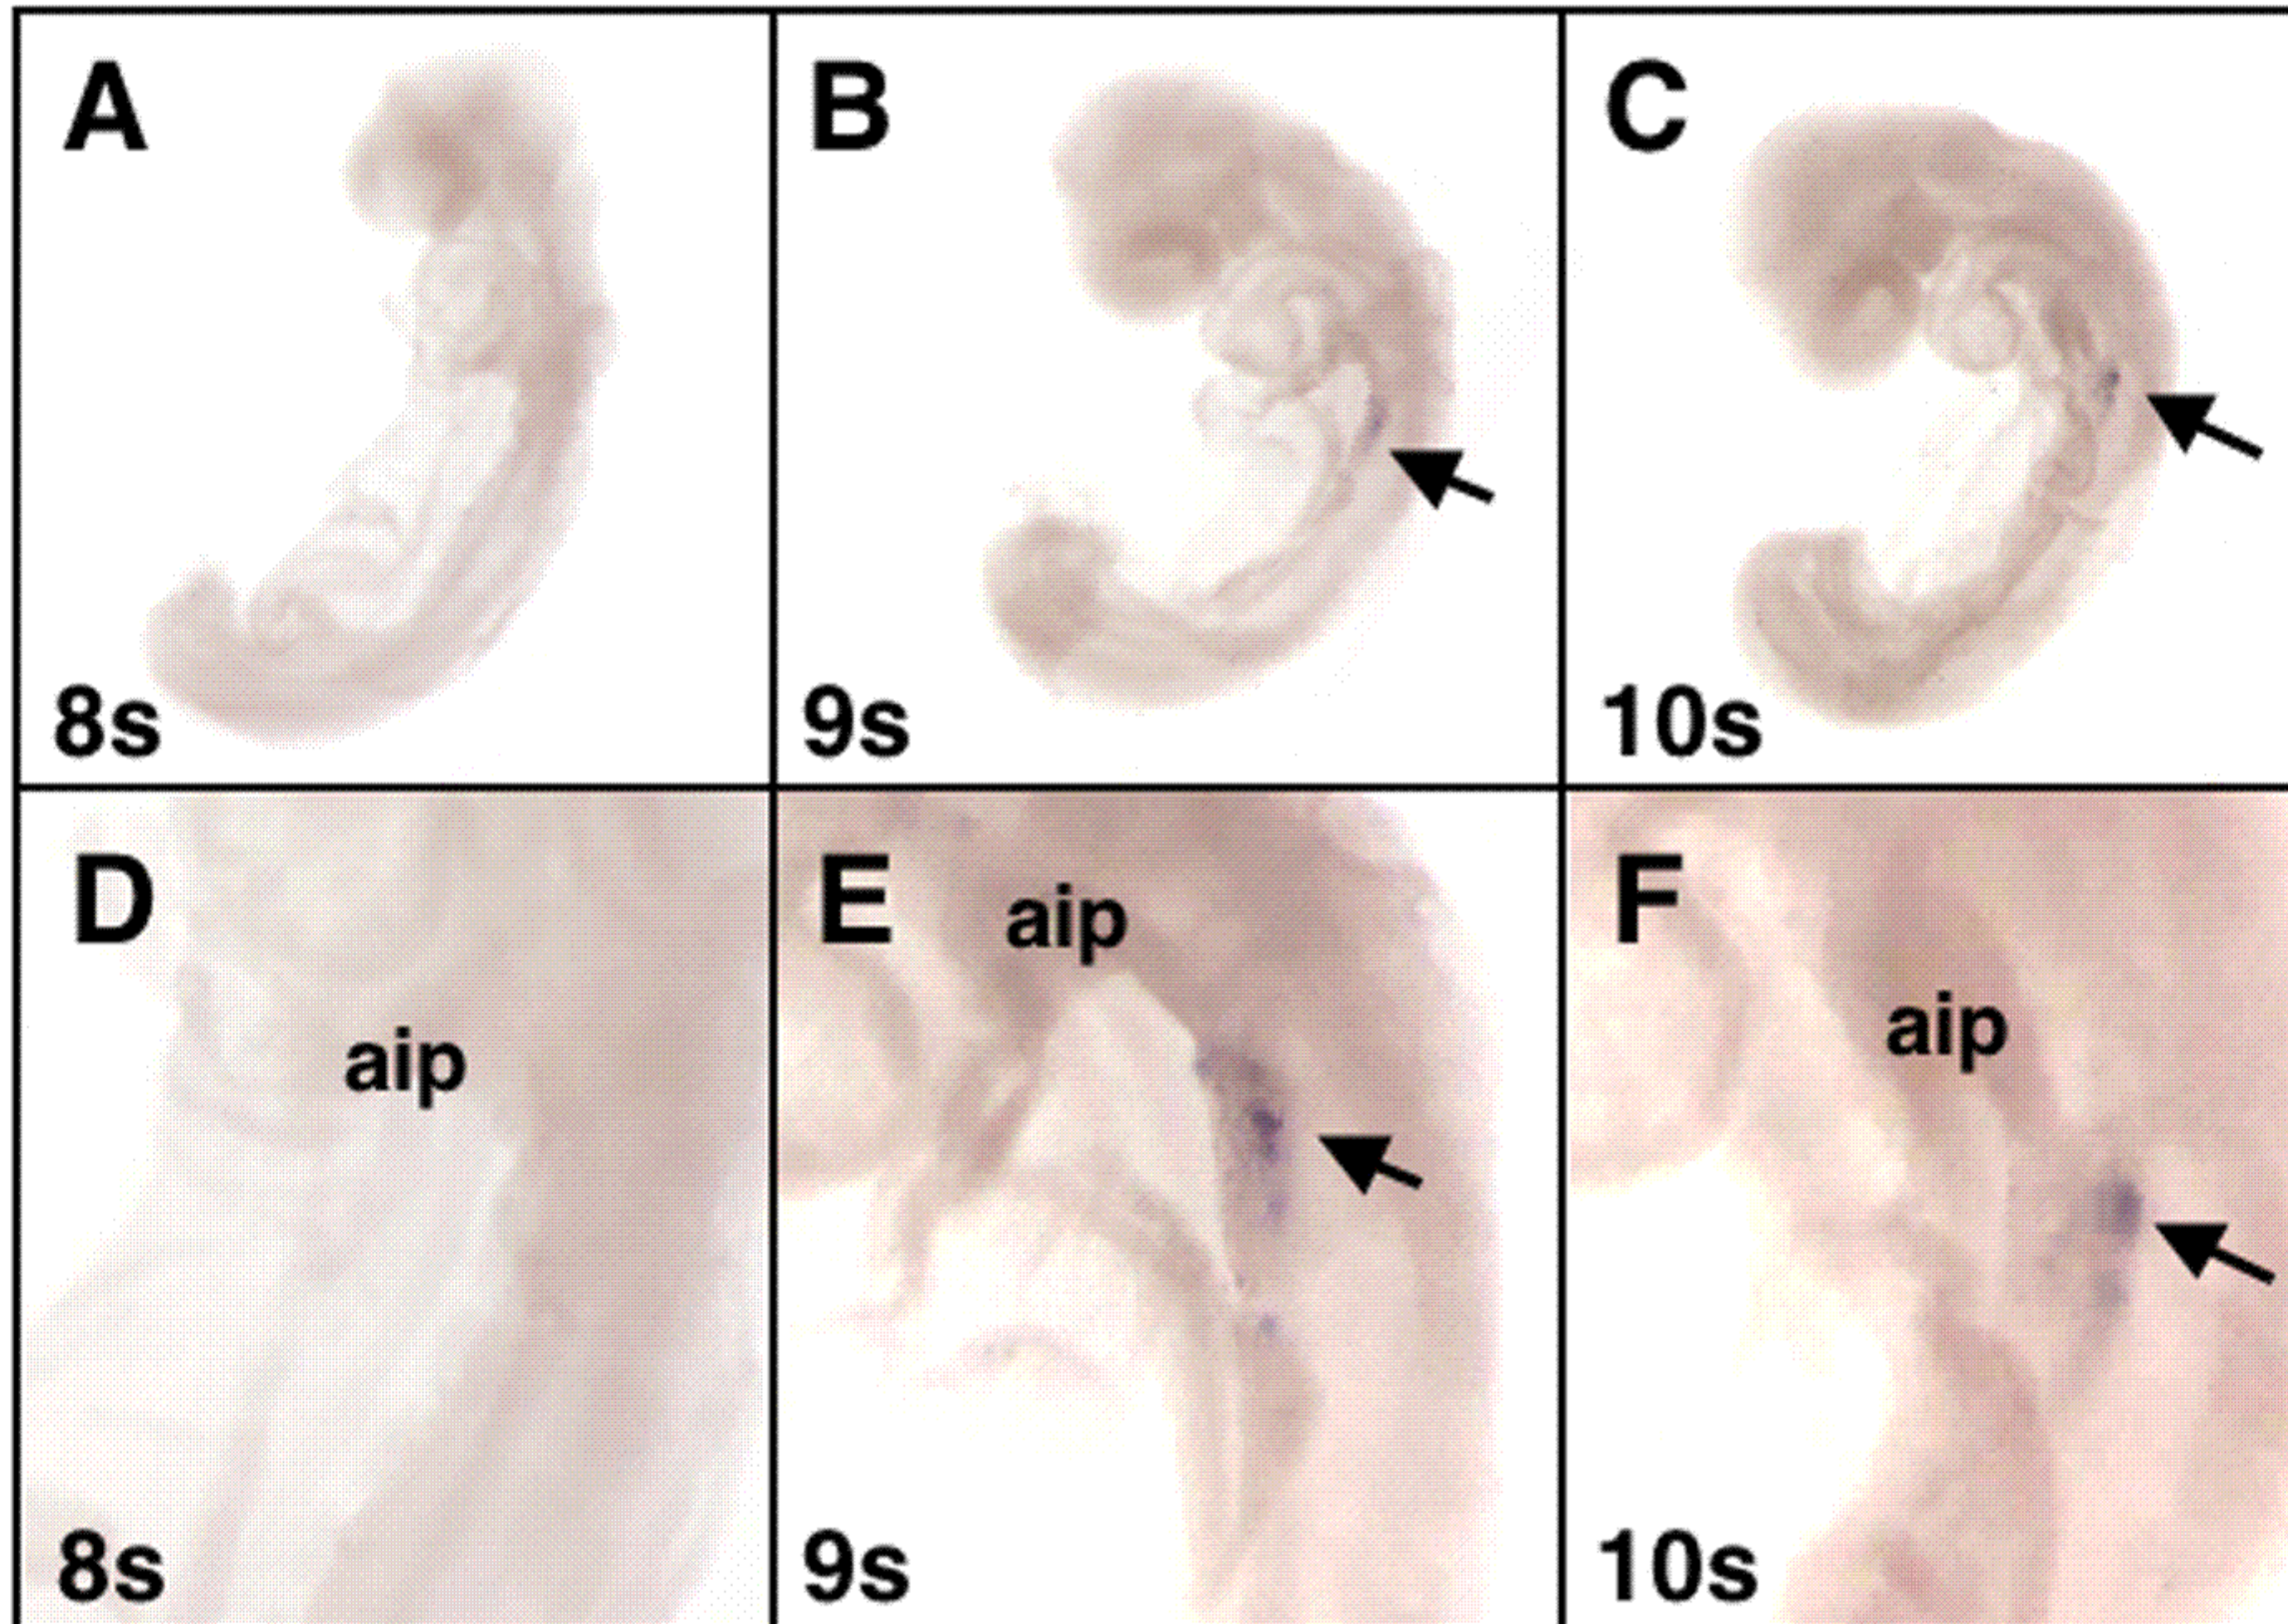

Type of file: figure

Label: s2

Filename: Supp.Fig.2.GIF



## Supplement Figure 2

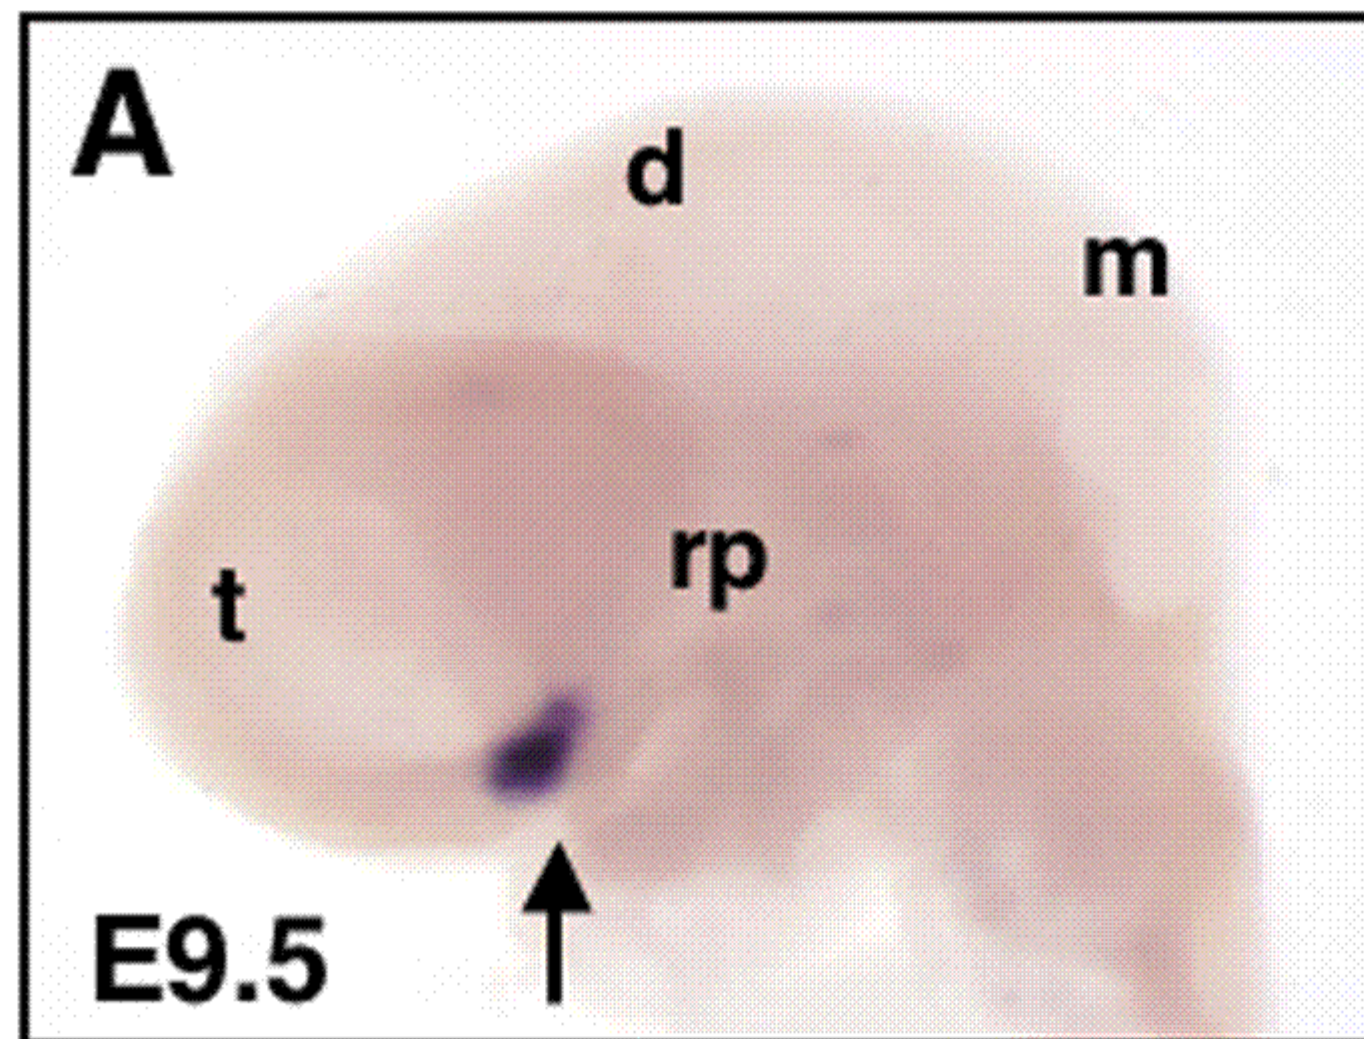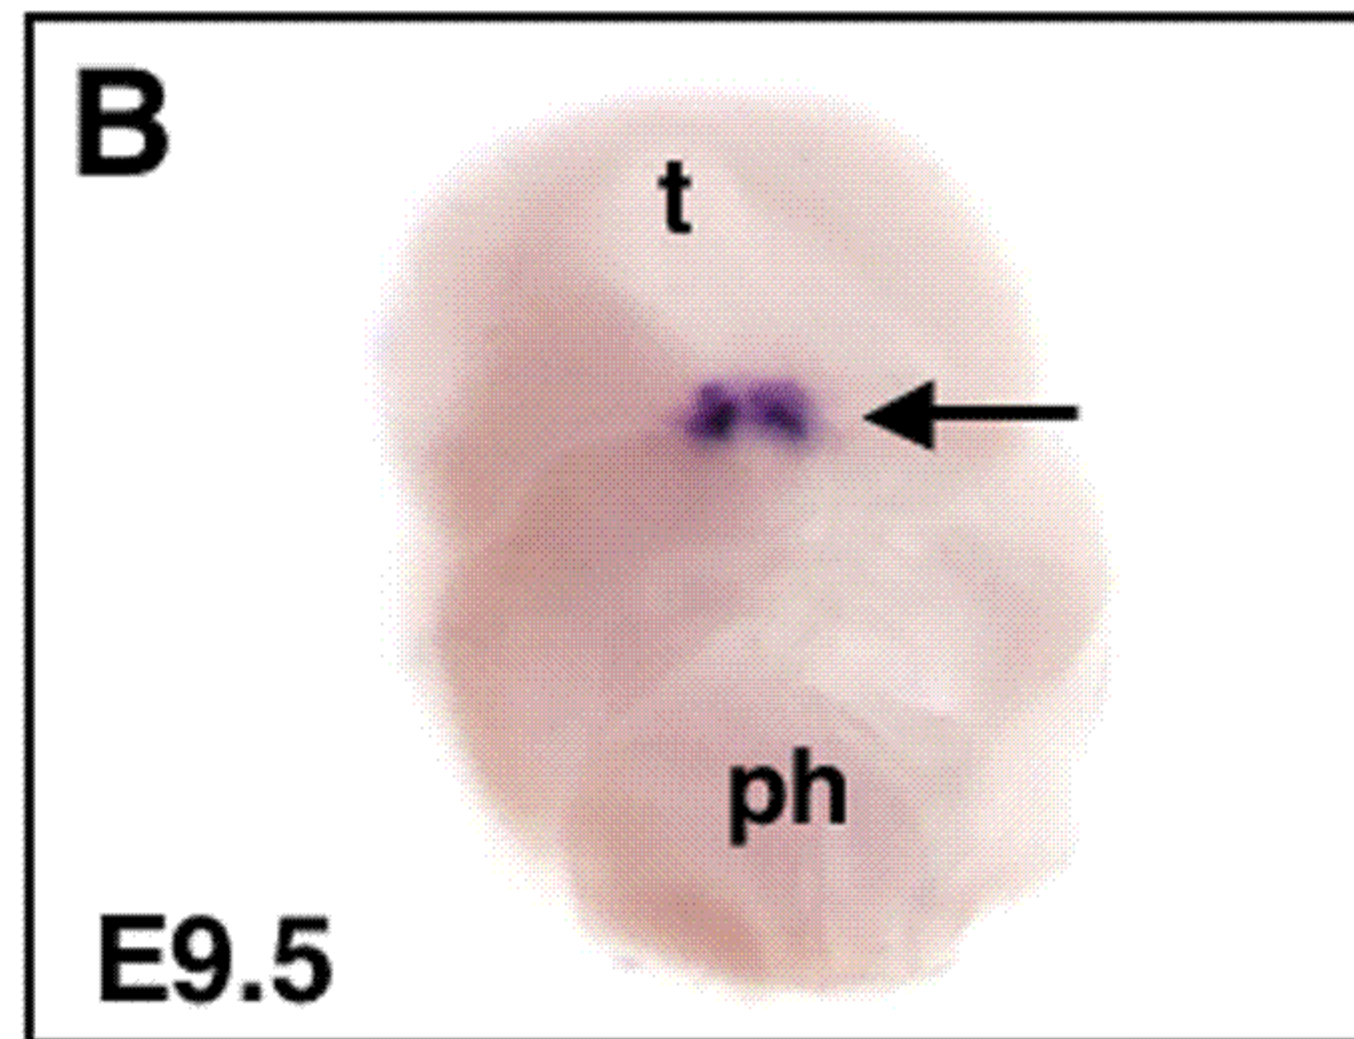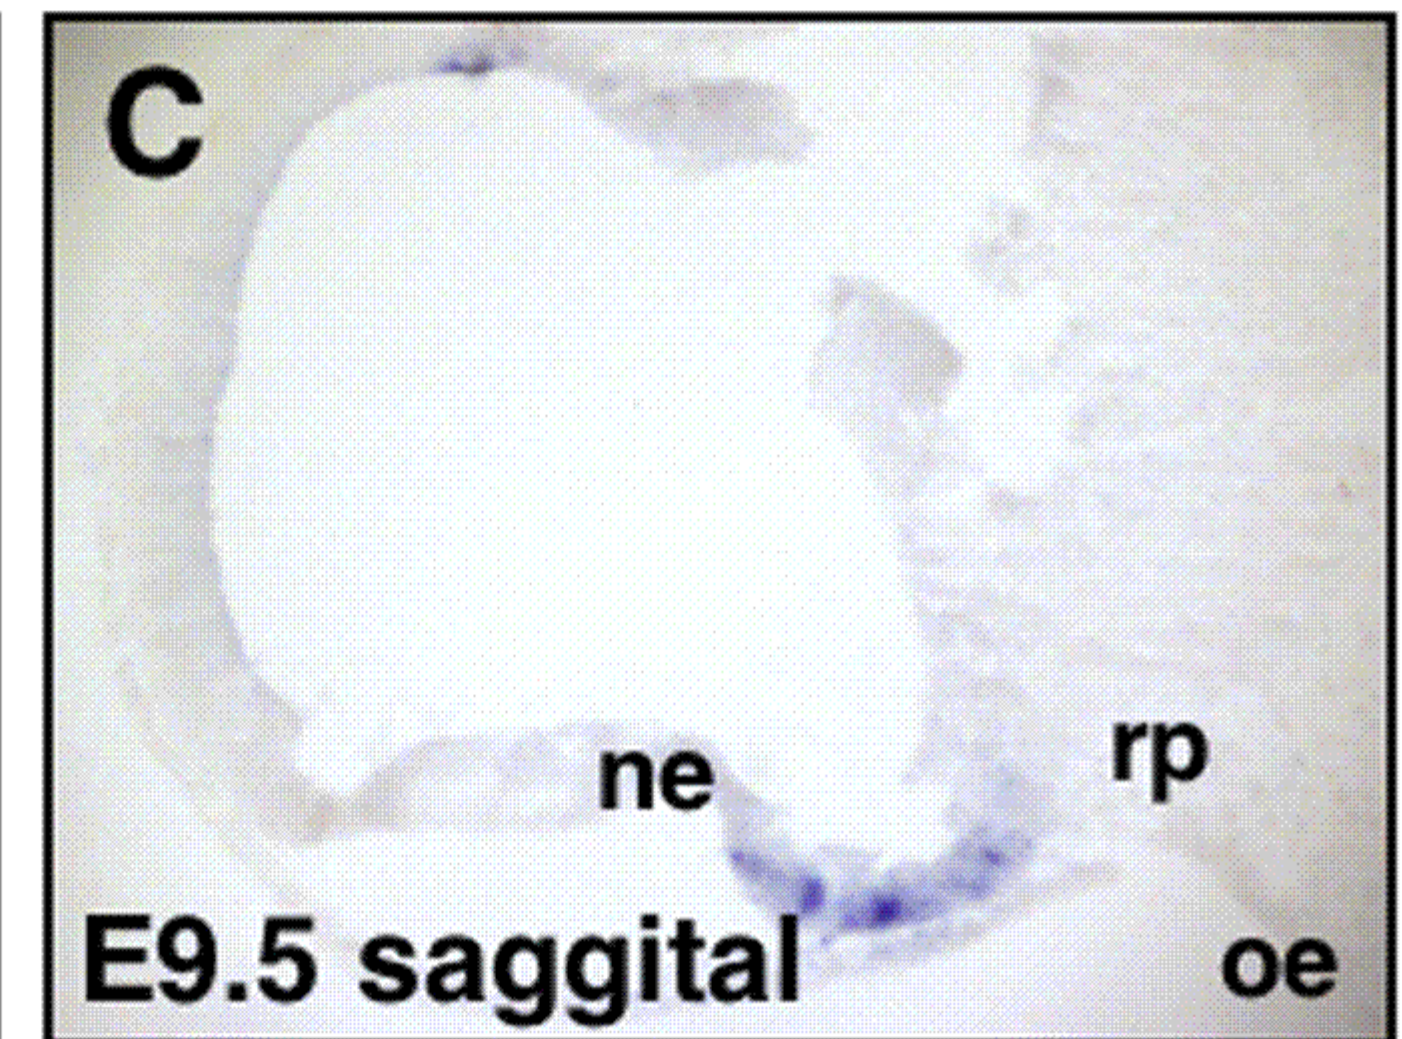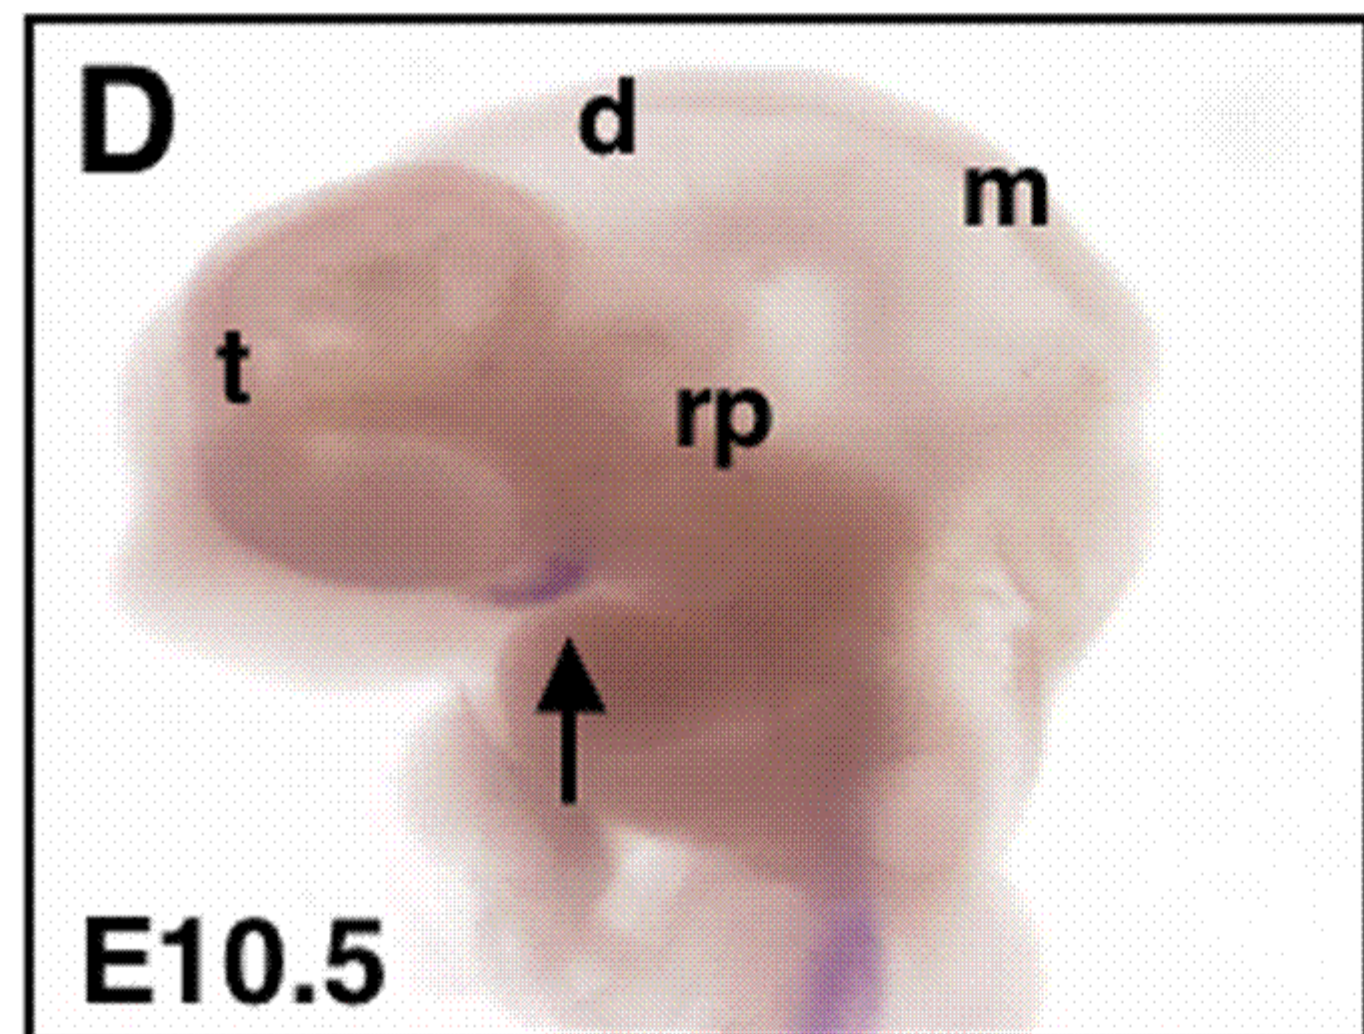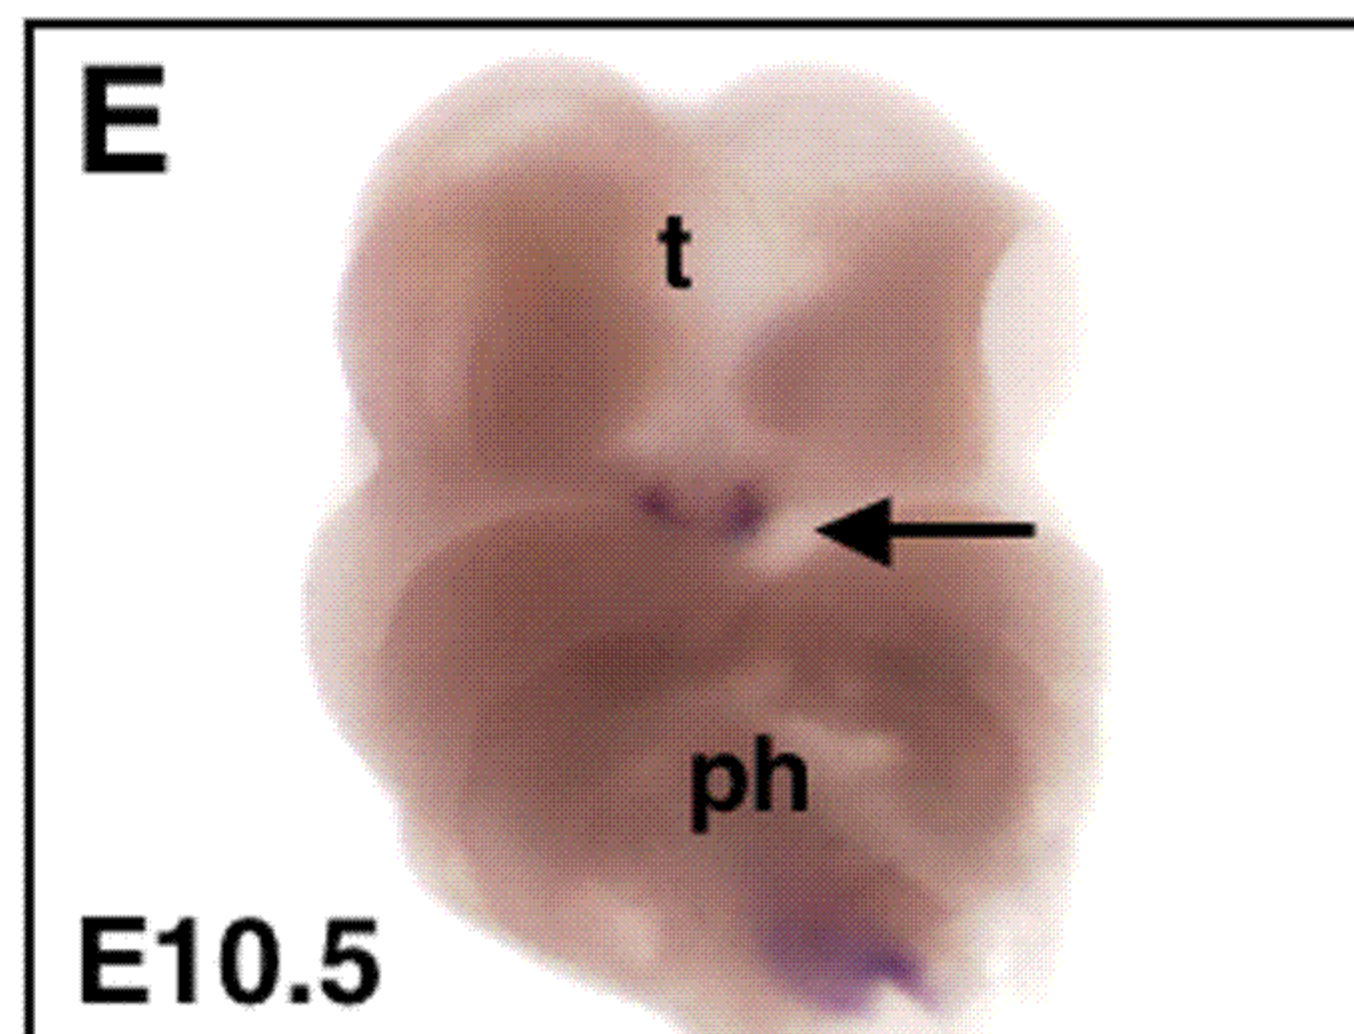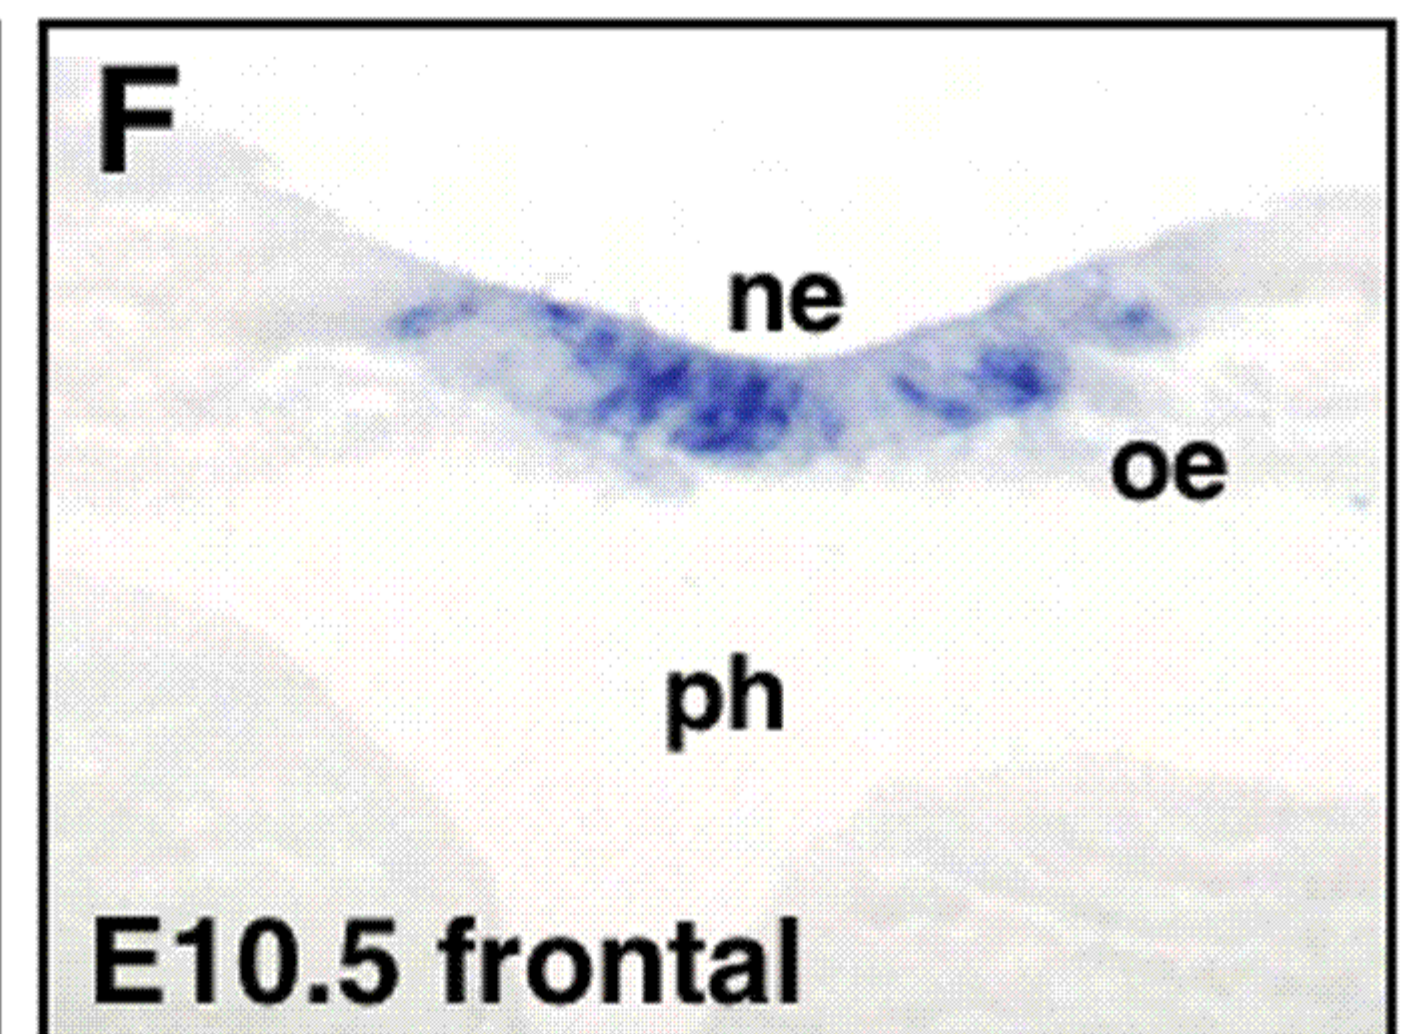



Type of file: figure

Label: s3

Filename: Supp.Fig.3.GIF

## Supplement Figure 3

**A** *Ngn3* relative expression levels (# embryos)

|                   | E10.5 | E11.5 | E12.5 | E13.5 |
|-------------------|-------|-------|-------|-------|
| No Expression     | 0     | 10    | 2     | 0     |
| Low Expression    | 4     | 9     | 9     | 0     |
| Medium Expression | 3     | 4     | 11    | 0     |
| High Expression   | 14    | 0     | 17    | 28    |

**B** Percentage (%) of embryos assayed

|                   | E10.5 | E11.5 | E12.5 | E13.5 |
|-------------------|-------|-------|-------|-------|
| No Expression     | 0     | 43    | 5     | 0     |
| Low Expression    | 19    | 39    | 23    | 0     |
| Medium Expression | 14    | 17    | 28    | 0     |
| High Expression   | 67    | 0     | 44    | 100   |

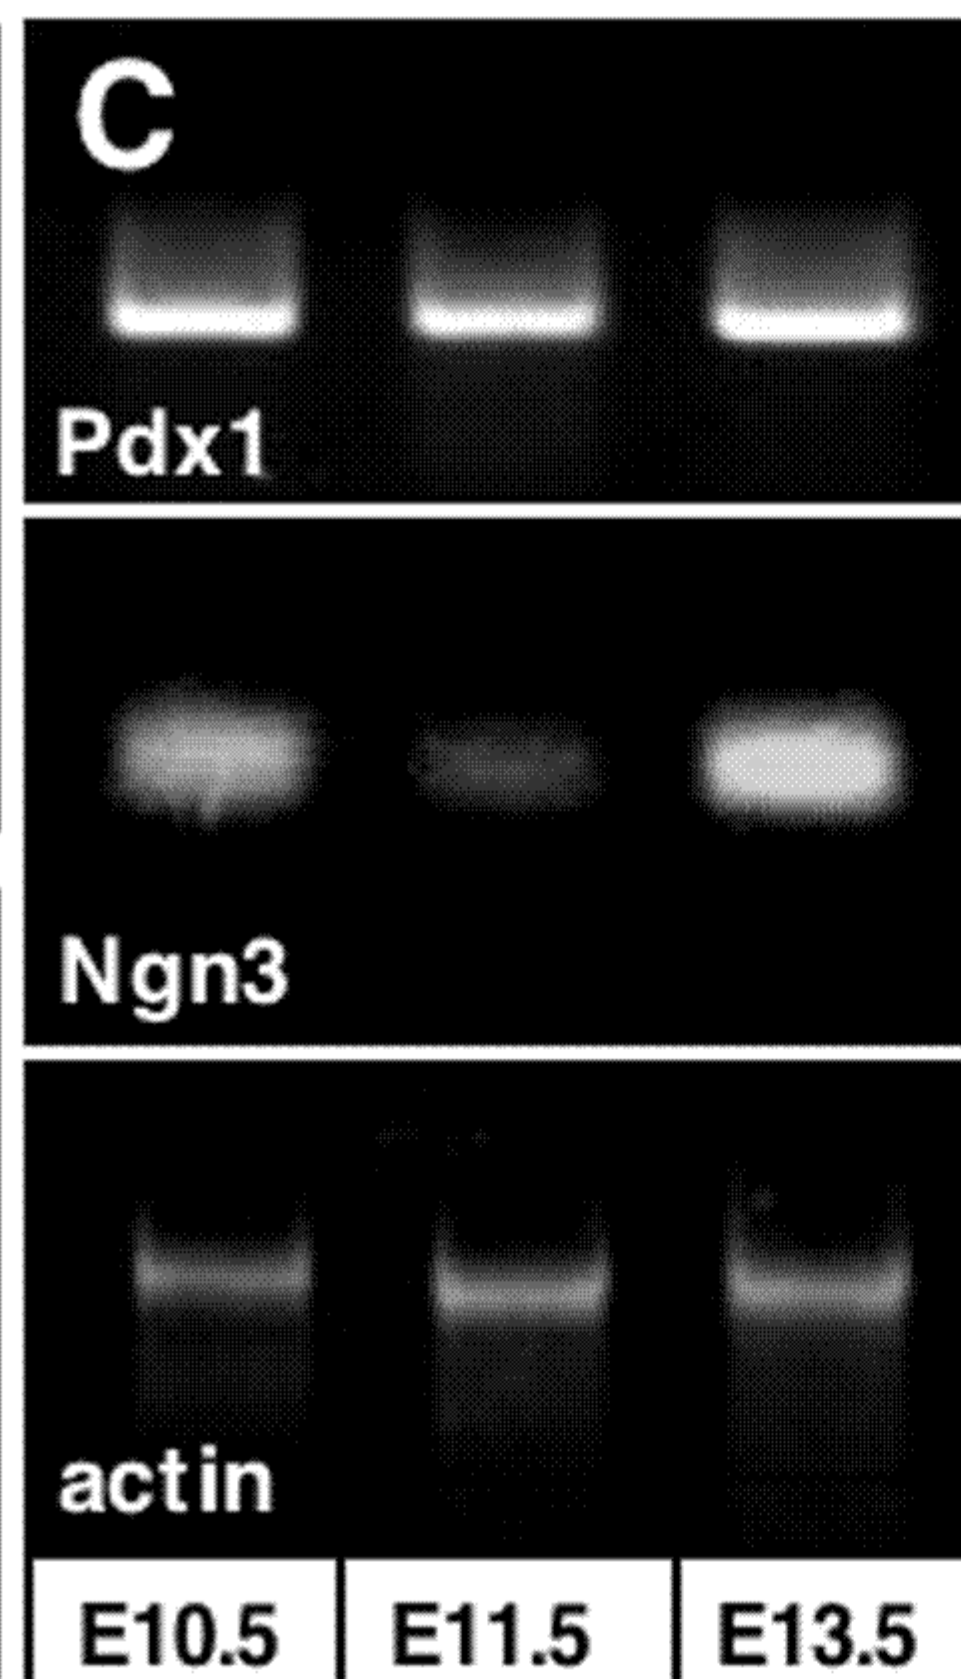

Supplement: NIHMS70321-supplement-supplement_1.pdf [file NIHMS70321-supplement-supplement_1.pdf]
